# Supplementary material
Source: PubMed Central journal article supplement (PMC4344130)
Supplement: NIHMS648817-supplement-Video_Legends.pdf [file NIHMS648817-supplement-Video_Legends.pdf]

## SUPPLEMENTAL VIDEO LEGENDS

### VIDEO 1: Example of transient reentry

Simultaneous voltage (left) and intracellular Ca (right) fluorescent optical mapping during pacing induced reentrant VF in isolated aged rat heart.

### VIDEO 2: Example of focal arrhythmia

Voltage-sensitive optical mapping during spontaneous initiation of multifocal VF in aged rat heart exposed to H<sub>2</sub>O<sub>2</sub>.  
(will be sent separately for size limitation)
